# Supplementary material for: Characterization of the first Peacock–Weakley polyoxometalate containing a transplutonium element: curium bis-pentatungstate [Cm(W5O18)2]9−
Source: Royal Society of Chemistry journal article supplement (doi:10.1039/d4cc01381f), 2024-01-01
Supplement: d4cc01381f1.pdf [file d4cc01381f1.pdf]

# *Supporting Information for:*

## **Characterization of the first Peacock-Weakley polyoxometalate containing a transplutonium element: curium *bis*-pentatungstate [Cm(W<sub>5</sub>O<sub>18</sub>)<sub>2</sub>]<sup>9-</sup>**

Ian Colliard<sup>a,b\*</sup> and Gauthier J.-P. Deblonde<sup>a,c\*</sup>

<sup>a</sup> *Physical and Life Sciences Directorate, Glenn T. Seaborg Institute, Lawrence Livermore National Laboratory, Livermore, California 94550, USA*

<sup>b</sup> *Material Sciences Division, Lawrence Livermore National Laboratory, Livermore, California 94550, USA*

<sup>c</sup> *Nuclear and Chemical Sciences Division, Lawrence Livermore National Laboratory, Livermore, California 94550, USA*

## **Experimental Section**

*Precaution: all isotopes for curium are highly radioactive and toxic! Extreme caution and appropriate procedures should be taken. All experiments involving radionuclides were conducted at Lawrence Livermore National Laboratory, in facilities designed for the safe handling of long-lived and short-lived radioactive materials and associated waste.*

**Materials:** Curium samples (97%  $^{248}\text{Cm}$  + 3%  $^{246}\text{Cm}$  + 0.01%  $^{247}\text{Cm}$ ) were prepared from a primary source purchased from Oak Ridge National Laboratory (USA).  $\text{NaCH}_3\text{COO}$  ( $\geq 99.9\%$ ), cesium chloride ( $>99.99\%$ ),  $\text{Na}_2\text{WO}_4 \cdot 2\text{H}_2\text{O}$  ( $\geq 99\%$ ), phosphoric acid, and lanthanide trichloride salts ( $>99.9\%$ ) were purchased from chemical providers (VWR and Millipore Sigma) and used as received. All solutions were prepared using deionized water purified by reverse osmosis cartridge system ( $\geq 18.2 \text{ M}\Omega\cdot\text{cm}$ ). All experiments were performed in a temperature-controlled room ( $22^\circ\text{C}$ ).

**Synthesis of Cs-CmW<sub>5</sub>:** The synthesis procedure was adapted from our first report of POM-based microscale synthesis.<sup>1</sup> First,  $^{247/246/248}\text{Cm}^{3+}$  from a parent stock solution in HCl is added to a  $100 \mu\text{M}$   $\text{W}_{10}$  (i.e. a  $1 \text{ mM}$   $\text{Na}_2\text{WO}_4$ ) solution in  $0.1 \text{ M}$  acetate buffer at pH 5.5. A 1:10 stoichiometric addition of actinide to  $\text{WO}_4^{2-}$  is made by adding the Cm solution dropwise. For crystallization,  $50 \mu\text{L}$   $6 \text{ M}$  CsCl is added to  $50 \mu\text{L}$  of the parent solution. The total amount of  $^{247/246/248}\text{Cm}$  in the test was  $1.24 \mu\text{g}$ . After two weeks at ambient conditions, several single crystals of the CmW<sub>5</sub> are visible to the naked eyes and fluoresce under UV light. Upon inspection with an optical microscope, XRD-quality crystals are mounted and characterized via small molecule single crystal XRD, while the rest are kept for Raman microscopy and fluorescence analysis.

**Synthesis of Cs-NdW<sub>5</sub>:** The synthesis procedure was a modified version of Peacock and Weakley synthesis.<sup>2</sup>  $5 \text{ g}$  of  $\text{Na}_2\text{WO}_4$  were added  $10 \text{ mL}$  of boiling  $\text{H}_2\text{O}$ . Then,  $0.07 \text{ g}$  of  $\text{NdCl}_3 \cdot 7\text{H}_2\text{O}$  was added to  $1 \text{ mL}$   $\text{H}_2\text{O}$ , this solution was then added dropwise to the boiling tungstate solution. After complete addition, the solution was cooled to room temperature and filtered to remove any unwanted paratungstates. After filtering,  $5 \text{ g}$  of CsCl were added and a precipitate was isolated. The precipitate was redissolved in boiling water and left to slowly cool. After about  $5 \text{ minutes}$  crystals suitable for scXRD appeared.

**Raman Microscopy.** Raman spectra were collected using a Senterra II confocal Raman microscope (Bruker), equipped with high resolution gratings ( $1,200 \text{ lines/mm}$ ) and a  $532 \text{ nm}$  laser source (operated at  $15 \text{ mW}$ ), and a TE-cooled CCD detector. Reported spectra are the average of at least 2-5 different spots per sample, each spot analysis consisting of 16 scans. The integration time was set to  $400 \text{ ms}$  per scan. No damage to the sample was observed due to the laser irradiation.

**Fluorescence spectroscopy.** Steady-state fluorescence spectra and fluorescence lifetimes were measured with a FLS1000 spectrometer (Edinburgh Instruments) equipped with a double

monochromator on the excitation arm and emission arm. A 450 W Xenon lamp was used as light source for the steady-state measurements and a 60 W microsecond flashlamp was used for lifetime measurements (MCS mode). Each lifetime decay curve contains 2,000 data points, with the maximum count per channel set to at least 1,000. The timespan of the acquisition was set so that the signal was measured until its return to background level. Lifetimes were calculated based on the dataset fit using the Fluoracle computer program (Edinburgh Instruments). Fluorescence data for liquid samples were measured in sealed quartz cuvettes or quartz tube inside a quartz Dewar (for liquid nitrogen temperature), and the emission was collected at 90° relative to the excitation. Fluorescence spectra for solid samples were measured at 45° relative to the sample.

**Crystallographic studies.** The CmW<sub>5</sub> and NdW<sub>5</sub> structures were collected at LLNL's radiochemistry laboratories using a Rigaku Synergy Custom single crystal diffractometer, equipped with a kappa goniometer and using Mo K $\alpha$  radiation ( $\lambda = 0.71073 \text{ \AA}$ ) with a FWHM of  $\sim 200 \text{ \mu m}$  at the sample from a MicroMax-007 HF microfocus rotating anode source. Images were recorded on a Dectris Pilatus 3R (300K – CdTe) detector and processed using CrysAlis<sup>Pro</sup>. After integration both analytical absorption and empirical absorption (spherical harmonic, image scaling, detector scaling) corrections were applied.<sup>3</sup> All structures were solved by Intrinsic Phasing method from SHELXT program<sup>4</sup>, developed by successive difference Fourier syntheses, and refined by full-matrix least square on all F<sup>2</sup> data using SHELX<sup>5</sup> via OLEX2 interface.<sup>6</sup>

Crystallographic information for the six reported structures can be obtained free of charge from the Cambridge Crystallographic Data Center (<https://www.ccdc.cam.ac.uk/>) upon referencing CCDC numbers in the crystallographic tables below.

**Notes on crystal structures, refinement, modeling of disorder, and solvent void space.** Due to safety protocol any curium containing crystals were collected under the MicroRT Capillaries 37mm. Although x-ray transparent at certain angles the background intensity increased resulting in poor signal-to-noise ratio, resulting in the use of some restraints.

Absorption correction was performed using Empirical absorption correction applied before frame scaling. Several other methods were employed, such as numerical absorption with a Gaussian grid (based on the crystal system), or analytical absorption correction after the Clark and Reid method before ultimately using a combination of Gaussian grid absorption correction and “Mutli-scan” using the Scale3 Abspack.<sup>3</sup> All of these methods relied on measuring the face of the crystal using CCD images capture before collection. The resulting R<sub>int</sub> after absorption correction dropped for each structure by approximately 3%. Nevertheless, large residual electron density less than 1  $\text{\AA}$  away from the tungsten atoms remained.

Furthermore, individual hydrogen atoms could not be refined, as such they have been omitted in the reported molecular weight.

**Table S1.** Single crystal XRD structures previously reported for trivalent lanthanides with the Peacock-Weakley POM, as well as the first trivalent actinide structure reported in the present study.

|                                                                                                                 | <b>Central cation</b>                                                                            | <b>Formula</b>                                                                                                         | <b>Reference</b>                                                                                                       |
|-----------------------------------------------------------------------------------------------------------------|--------------------------------------------------------------------------------------------------|------------------------------------------------------------------------------------------------------------------------|------------------------------------------------------------------------------------------------------------------------|
| <b>Actinides</b>                                                                                                | Cm <sup>3+</sup>                                                                                 | NaCs <sub>8</sub> [Cm(W <sub>5</sub> O <sub>18</sub> ) <sub>2</sub> ]·14H <sub>2</sub> O                               | This study                                                                                                             |
| <b>Lanthanides with Cs<sup>+</sup> counter ion</b>                                                              | Nd <sup>3+</sup>                                                                                 | Na <sub>3</sub> Cs <sub>6</sub> [Nd(W <sub>5</sub> O <sub>18</sub> ) <sub>2</sub> ]·18H <sub>2</sub> O                 | This study                                                                                                             |
|                                                                                                                 | Ce <sup>3+</sup>                                                                                 | Na <sub>9</sub> [Ce(W <sub>5</sub> O <sub>18</sub> )]·NaCl·30H <sub>2</sub> O                                          | 10                                                                                                                     |
|                                                                                                                 | Nd <sup>3+</sup>                                                                                 | Na <sub>9</sub> [Nd(W <sub>5</sub> O <sub>18</sub> ) <sub>2</sub> ]·32H <sub>2</sub> O                                 | 1,11                                                                                                                   |
|                                                                                                                 | Sm <sup>3+</sup>                                                                                 | Na <sub>6</sub> H <sub>3</sub> [Sm(W <sub>5</sub> O <sub>18</sub> ) <sub>2</sub> ]·28H <sub>2</sub> O                  | 12                                                                                                                     |
|                                                                                                                 | Eu <sup>3+</sup>                                                                                 | Na <sub>9</sub> [Eu(W <sub>5</sub> O <sub>18</sub> ) <sub>2</sub> ]·32H <sub>2</sub> O                                 | 13                                                                                                                     |
|                                                                                                                 |                                                                                                  | Na <sub>9</sub> [Eu(W <sub>5</sub> O <sub>18</sub> ) <sub>2</sub> ]·34H <sub>2</sub> O                                 | 1                                                                                                                      |
|                                                                                                                 | Gd <sup>3+</sup>                                                                                 | Na <sub>9</sub> [Gd(W <sub>5</sub> O <sub>18</sub> ) <sub>2</sub> ]·35H <sub>2</sub> O                                 | 14                                                                                                                     |
|                                                                                                                 |                                                                                                  | Na <sub>8</sub> H[Gd(W <sub>5</sub> O <sub>18</sub> ) <sub>2</sub> ]·35H <sub>2</sub> O                                | 15                                                                                                                     |
|                                                                                                                 | Dy <sup>3+</sup>                                                                                 | Na <sub>9</sub> [Dy(W <sub>5</sub> O <sub>18</sub> ) <sub>2</sub> ]·35H <sub>2</sub> O                                 | 16                                                                                                                     |
|                                                                                                                 | Ho <sup>3+</sup>                                                                                 | Na <sub>9</sub> [Ho <sub>x</sub> Y <sub>(1-x)</sub> (W <sub>5</sub> O <sub>18</sub> ) <sub>2</sub> ]·nH <sub>2</sub> O | 17                                                                                                                     |
|                                                                                                                 | Er <sup>3+</sup>                                                                                 | Na <sub>9</sub> [Er(W <sub>5</sub> O <sub>18</sub> ) <sub>2</sub> ]·34H <sub>2</sub> O                                 | 18                                                                                                                     |
|                                                                                                                 |                                                                                                  | Na <sub>9</sub> [Er(W <sub>5</sub> O <sub>18</sub> ) <sub>2</sub> ]·35H <sub>2</sub> O                                 | 14 19                                                                                                                  |
|                                                                                                                 | Tm <sup>3+</sup>                                                                                 | Na <sub>9</sub> [Tm(W <sub>5</sub> O <sub>18</sub> ) <sub>2</sub> ]·35H <sub>2</sub> O                                 | 20                                                                                                                     |
|                                                                                                                 | Yb <sup>3+</sup>                                                                                 | Na <sub>9</sub> [Yb(W <sub>5</sub> O <sub>18</sub> ) <sub>2</sub> ]·35H <sub>2</sub> O                                 | 20                                                                                                                     |
|                                                                                                                 | <b>Lanthanides with Na<sup>+</sup>, K<sup>+</sup> and NH<sub>4</sub><sup>+</sup> counter ion</b> | La <sup>3+</sup>                                                                                                       | Na <sub>2</sub> (NH <sub>4</sub> ) <sub>7</sub> [La(W <sub>5</sub> O <sub>18</sub> ) <sub>2</sub> ]·16H <sub>2</sub> O |
| Sm <sup>3+</sup>                                                                                                |                                                                                                  | Na <sub>4</sub> K <sub>3</sub> H <sub>2</sub> [Sm(W <sub>5</sub> O <sub>18</sub> ) <sub>2</sub> ]·22H <sub>2</sub> O   | 22                                                                                                                     |
| Pr <sup>3+</sup> , Nd <sup>3+</sup> , Sm <sup>3+</sup> , Gd <sup>3+</sup> , Tb <sup>3+</sup> , Dy <sup>3+</sup> |                                                                                                  | Na <sub>4</sub> K <sub>3</sub> H <sub>2</sub> [Ln(W <sub>5</sub> O <sub>18</sub> ) <sub>2</sub> ]·nH <sub>2</sub> O    | 23                                                                                                                     |
| Tb <sup>3+</sup>                                                                                                |                                                                                                  | Na <sub>4</sub> K <sub>3</sub> H <sub>2</sub> [Tb(W <sub>5</sub> O <sub>18</sub> ) <sub>2</sub> ]·20H <sub>2</sub> O   | 24                                                                                                                     |

**Table S2.** Crystallographic and refinement information for NaCs<sub>8</sub>Cm(W<sub>5</sub>O<sub>18</sub>)<sub>2</sub>·14H<sub>2</sub>O (**CmW<sub>5</sub>**).

|                                                   |                                                                     |
|---------------------------------------------------|---------------------------------------------------------------------|
| <b>Identification code</b>                        | <b>CmW<sub>5</sub></b>                                              |
| <b>Empirical formula</b>                          | CmCs <sub>8</sub> NaO <sub>50</sub> W <sub>10</sub> H <sub>28</sub> |
| <b>CCDC ID</b>                                    | 2333195                                                             |
| <b>Formula weight</b>                             | 3997.01                                                             |
| <b>Temperature/K</b>                              | 298                                                                 |
| <b>Crystal system</b>                             | triclinic                                                           |
| <b>Space group</b>                                | P-1                                                                 |
| <b>a/Å</b>                                        | 11.46121(14)                                                        |
| <b>b/Å</b>                                        | 14.46007(19)                                                        |
| <b>c/Å</b>                                        | 17.5536(2)                                                          |
| <b>α/°</b>                                        | 101.1099(11)                                                        |
| <b>β/°</b>                                        | 99.4298(11)                                                         |
| <b>γ/°</b>                                        | 103.2930(11)                                                        |
| <b>Volume/Å<sup>3</sup></b>                       | 2711.36(6)                                                          |
| <b>Z</b>                                          | 2                                                                   |
| <b>ρ<sub>calc</sub>/cm<sup>3</sup></b>            | 4.861                                                               |
| <b>μ/mm<sup>-1</sup></b>                          | 28.007                                                              |
| <b>F(000)</b>                                     | 3374.0                                                              |
| <b>Crystal size/mm<sup>3</sup></b>                | 0.131 × 0.106 × 0.036                                               |
| <b>Radiation</b>                                  | Mo Kα (λ = 0.71073)                                                 |
| <b>2θ range for data collection/°</b>             | 6.724 to 64.154                                                     |
| <b>Index ranges</b>                               | -15 ≤ h ≤ 16, -17 ≤ k ≤ 21, -24 ≤ l ≤ 25                            |
| <b>Reflections collected</b>                      | 53460                                                               |
| <b>Independent reflections</b>                    | 15597 [R <sub>int</sub> = 0.0714, R <sub>sigma</sub> = 0.0550]      |
| <b>Data/restraints/parameters</b>                 | 15597/0/631                                                         |
| <b>Goodness-of-fit on F<sup>2</sup></b>           | 1.042                                                               |
| <b>Final R indexes [I ≥ 2σ(I)]</b>                | R <sub>1</sub> = 0.0568, wR <sub>2</sub> = 0.1514                   |
| <b>Final R indexes [all data]</b>                 | R <sub>1</sub> = 0.0638, wR <sub>2</sub> = 0.1557                   |
| <b>Largest diff. peak/hole / e Å<sup>-3</sup></b> | 8.41/-10.50                                                         |

**Table S3.** Crystallographic and refinement information for Na<sub>3</sub>Cs<sub>6</sub>[Nd(W<sub>5</sub>O<sub>18</sub>)<sub>2</sub>]·18H<sub>2</sub>O (Cs-NdW<sub>5</sub>).

| Identification code                               | NdW5-Cs                                                                           |
|---------------------------------------------------|-----------------------------------------------------------------------------------|
| <b>Empirical formula</b>                          | Cs <sub>6</sub> Na <sub>3</sub> NdO <sub>54</sub> W <sub>10</sub> H <sub>36</sub> |
| <b>CCDC ID</b>                                    | 2326544                                                                           |
| <b>Formula weight</b>                             | 3749.47                                                                           |
| <b>Temperature/K</b>                              | 298                                                                               |
| <b>Crystal system</b>                             | triclinic                                                                         |
| <b>Space group</b>                                | P-1                                                                               |
| <b>a/Å</b>                                        | 11.35520(10)                                                                      |
| <b>b/Å</b>                                        | 15.4905(2)                                                                        |
| <b>c/Å</b>                                        | 16.9027(2)                                                                        |
| <b>α/°</b>                                        | 101.3710(10)                                                                      |
| <b>β/°</b>                                        | 104.4240(10)                                                                      |
| <b>γ/°</b>                                        | 91.7010(10)                                                                       |
| <b>Volume/Å<sup>3</sup></b>                       | 2813.17(6)                                                                        |
| <b>Z</b>                                          | 2                                                                                 |
| <b>ρ<sub>calc</sub>/cm<sup>3</sup></b>            | 4.384                                                                             |
| <b>μ/mm<sup>-1</sup></b>                          | 25.216                                                                            |
| <b>F(000)</b>                                     | 3190.0                                                                            |
| <b>Crystal size/mm<sup>3</sup></b>                | 0.011 × 0.012 × 0.009                                                             |
| <b>Radiation</b>                                  | Mo Kα (λ = 0.71073)                                                               |
| <b>2θ range for data collection/°</b>             | 7.03 to 60.968                                                                    |
| <b>Index ranges</b>                               | -15 ≤ h ≤ 15, -20 ≤ k ≤ 20, -24 ≤ l ≤ 24                                          |
| <b>Reflections collected</b>                      | 42850                                                                             |
| <b>Independent reflections</b>                    | 14633 [R <sub>int</sub> = 0.0689, R <sub>sigma</sub> = 0.0598]                    |
| <b>Data/restraints/parameters</b>                 | 14633/0/667                                                                       |
| <b>Goodness-of-fit on F<sup>2</sup></b>           | 1.014                                                                             |
| <b>Final R indexes [I ≥ 2σ (I)]</b>               | R <sub>1</sub> = 0.0515, wR <sub>2</sub> = 0.1388                                 |
| <b>Final R indexes [all data]</b>                 | R <sub>1</sub> = 0.0585, wR <sub>2</sub> = 0.1433                                 |
| <b>Largest diff. peak/hole / e Å<sup>-3</sup></b> | 4.81/-4.23                                                                        |

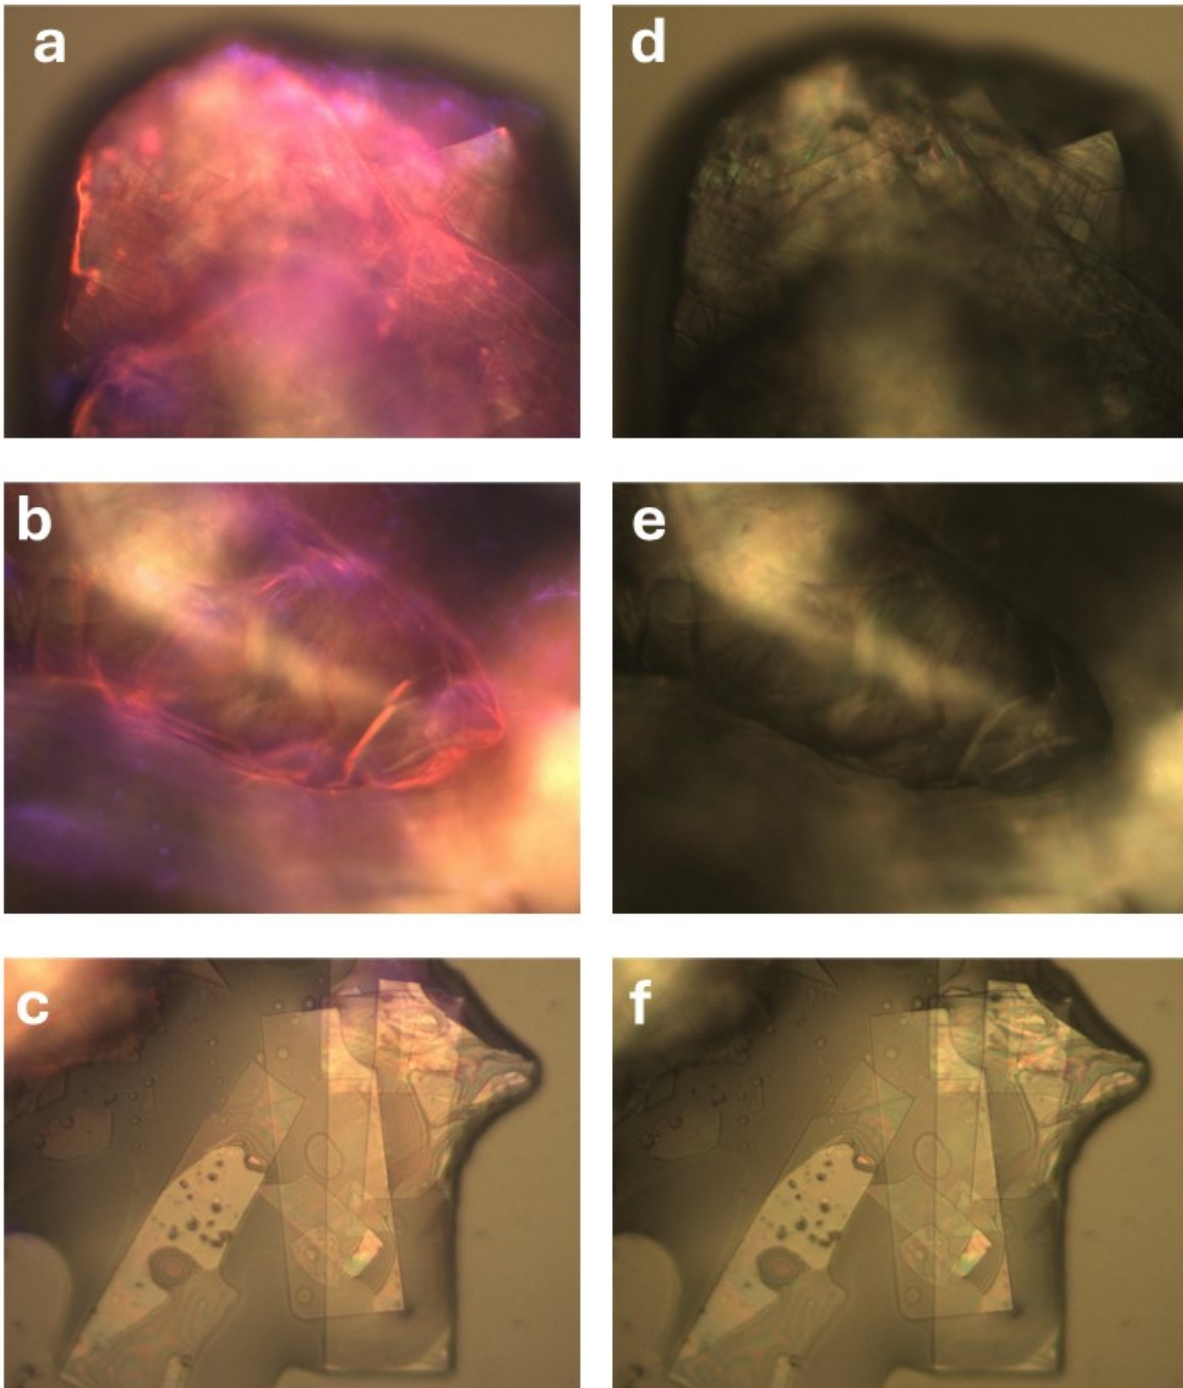

**Figure S1.** Microscope images of crystals of Cs-CmW<sub>5</sub> a-c) under UV-light d-f) under normal light. The pink-red fluorescence is characteristic of the sensitized emission from Cm<sup>3+</sup> complexes.

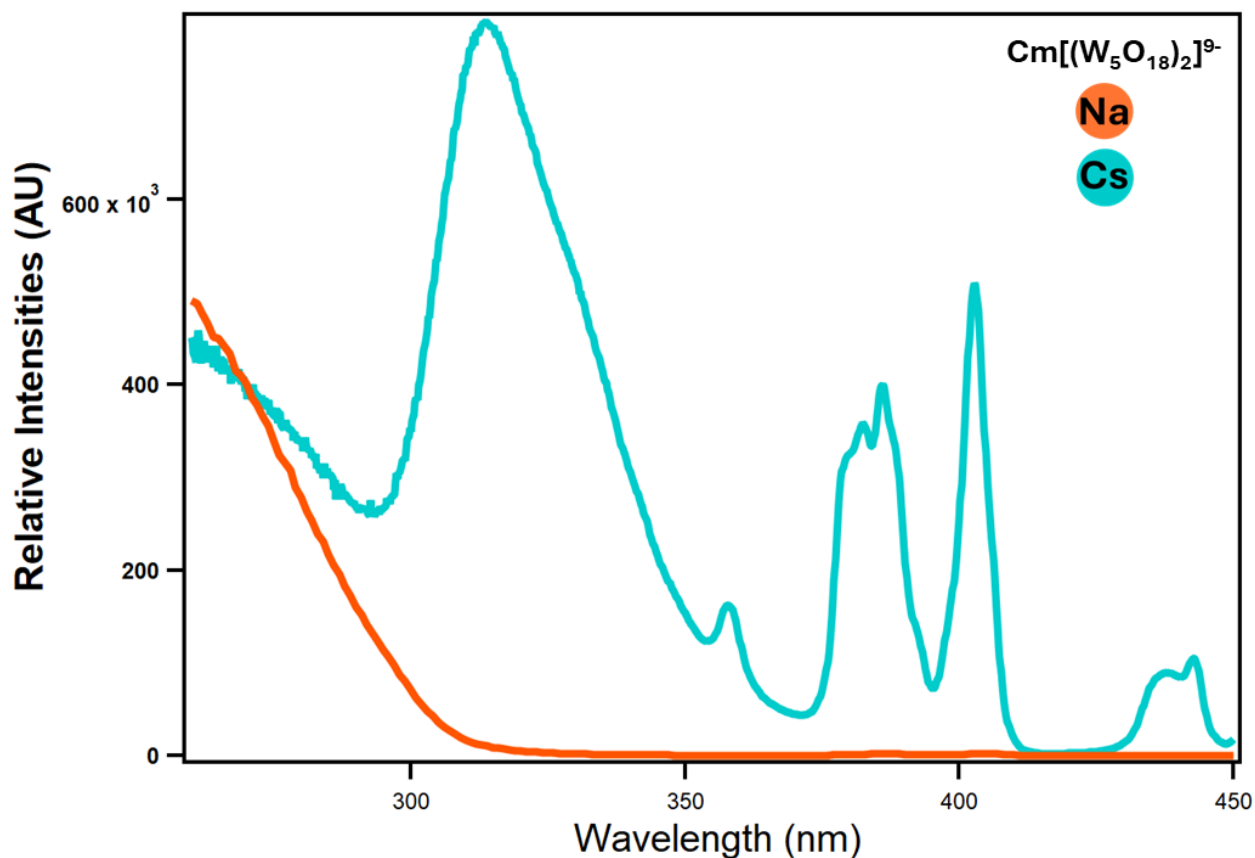

**Figure S2.** Excitation spectra of single crystals of Cs-CmW<sub>5</sub> (blue) and evaporated sample of Na-CmW<sub>5</sub> (orange). The large band below ~320 nm is characteristic of the W<sub>5</sub> POM complexed to curium. The four sharp peaks at ~360, ~380, ~405, and ~440 nm are characteristic of the 5f-5f transitions from Cm<sup>3+</sup>. The large band centered at ~325 nm in the case of Cs-CmW<sub>5</sub> is due to crystallography oil used for handling of the single crystals.



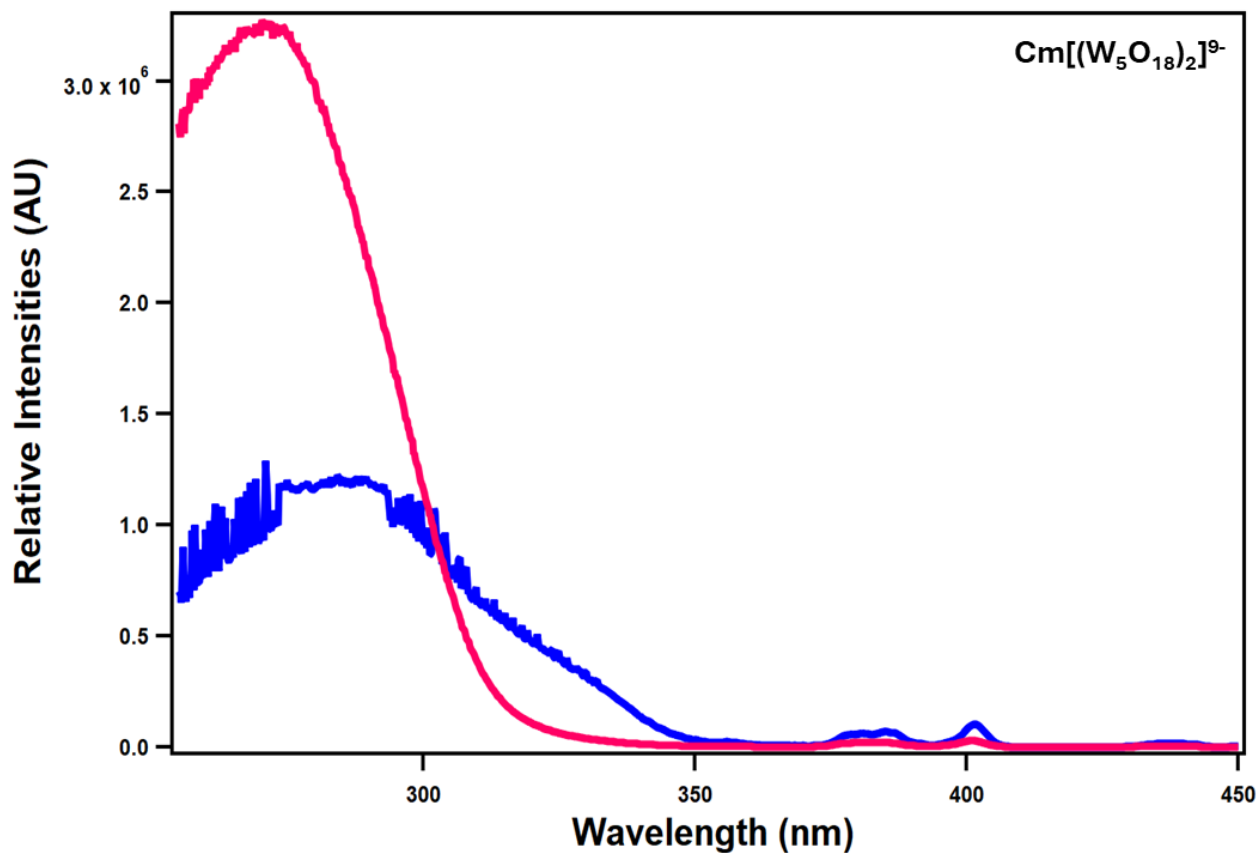

**Figure S3.** Excitation spectra for Na-CmW<sub>5</sub> in 1:4 v/v water/glycerol. Blue spectrum: liquid nitrogen temperature. Pink spectrum: Room temperature (22°C). The large band below ~320 nm is characteristic of the W<sub>5</sub> POM complexed to curium. This band shifts to below ~350 nm upon cooling to liquid nitrogen temperature. The four sharp peaks at ~360, ~380, ~405, and ~440 nm are characteristic of the 5f-5f transitions from Cm<sup>3+</sup>.

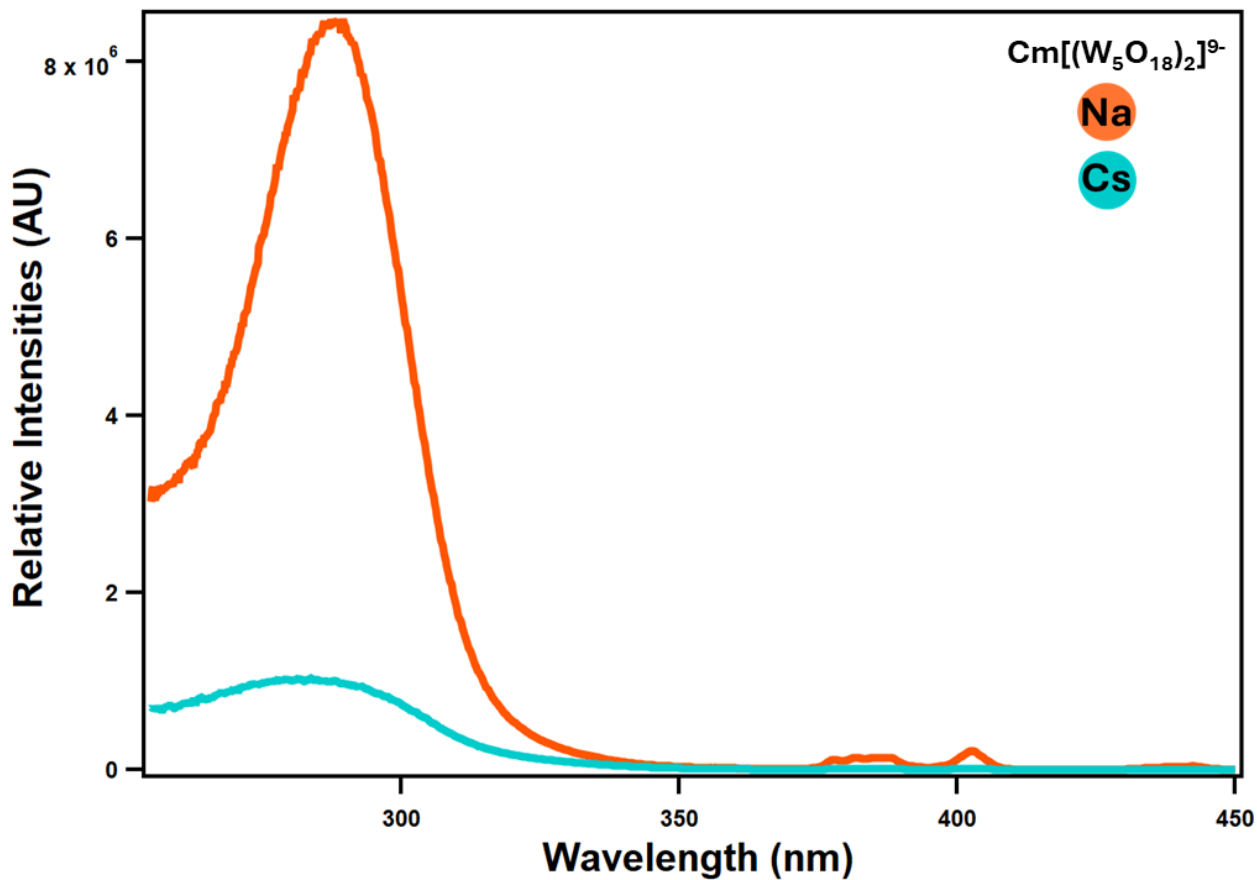

**Figure S4.** Excitation spectra for aqueous solutions of Cs-CmW<sub>5</sub> (blue) and Na-CmW<sub>5</sub> (Orange). pH = 5.5 (0.1 M acetate buffer). The large band below ~320 nm is characteristic of the POM. The four sharp peaks at ~360, ~380, ~405, and ~440 nm are characteristic of the 5f-5f transitions from Cm<sup>3+</sup>.

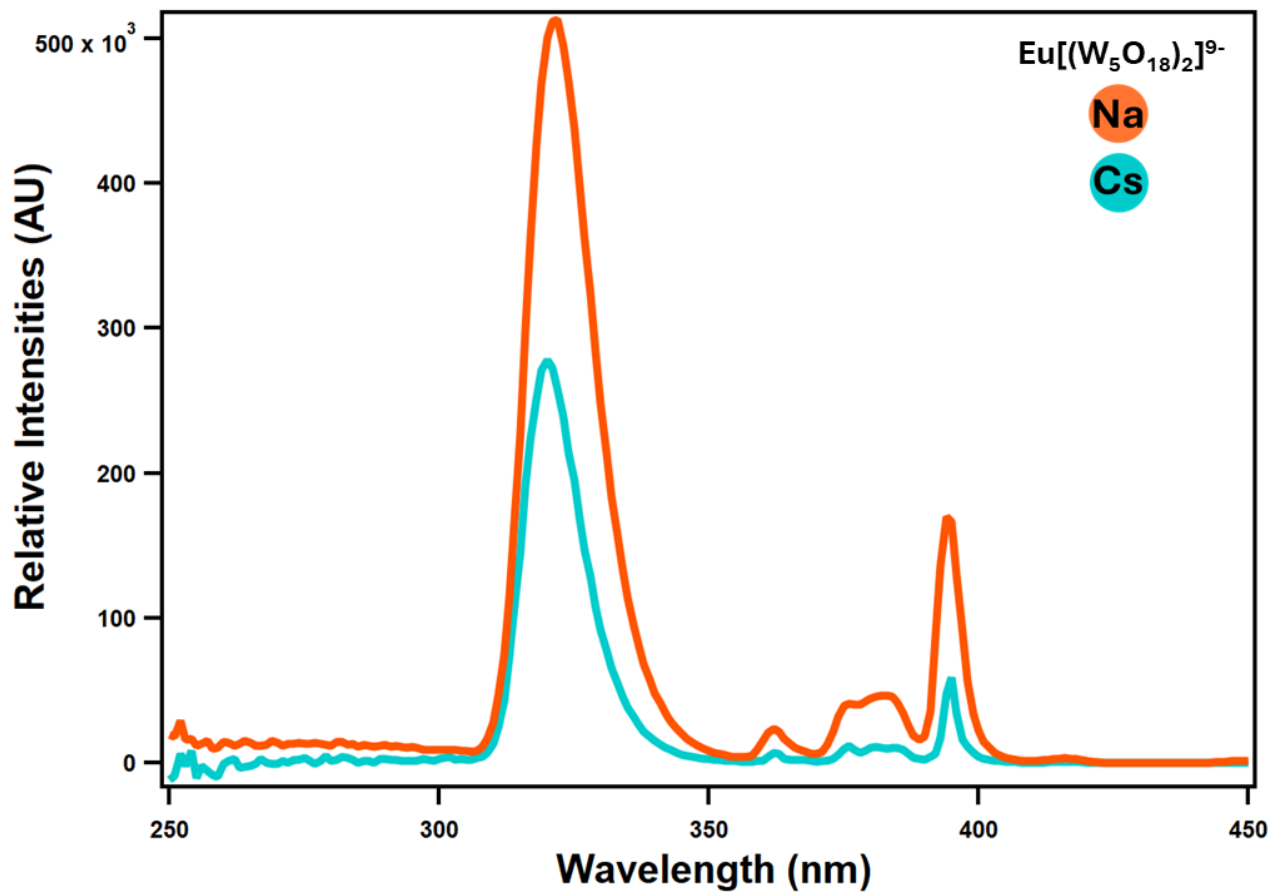

**Figure S5.** Excitation spectra for crystals of Cs-EuW<sub>5</sub> (blue) and Na-EuW<sub>5</sub> (Orange). The three sharp peaks at ~360, ~375, and ~395 nm are characteristic of the 4f-4f transitions from Eu<sup>3+</sup>.

**Table S4.** Summary of fluorescence emission peak positions and lifetimes as a function of the Na and Cs counterions for the  $[\text{Eu}(\text{W}_5\text{O}_{18})_2]^{9-}$  and  $[\text{Cm}(\text{W}_5\text{O}_{18})_2]^{9-}$ .

| $\text{Cm}[(\text{W}_5\text{O}_{18})_2]^{9-}$                   | Solution Em peak (nm) | Lifetime decay ( $\mu\text{s}$ ) | Solid Em peak (nm) | Lifetime decay ( $\mu\text{s}$ ) |
|-----------------------------------------------------------------|-----------------------|----------------------------------|--------------------|----------------------------------|
| <b>Na</b>                                                       | 605                   | 780                              | 605                | 700                              |
| <b>Cs</b>                                                       | 606                   | 515                              | 608                | 341                              |
| <b>(RT) Na</b>                                                  | 605                   | 125                              | N/A                | N/A                              |
| <b>(LN<sub>2</sub>) Na</b>                                      | 605                   | 200                              | N/A                | N/A                              |
| <b><math>\text{Eu}[(\text{W}_5\text{O}_{18})_2]^{9-}</math></b> |                       |                                  |                    |                                  |
| <b>Na</b>                                                       | 701                   | 3051                             | 701                | 2240                             |
| <b>Cs</b>                                                       | 701                   | 3431                             | 701                | 3041                             |

## References

- 1 I. Colliard, J. R. I. Lee, C. A. Colla, H. E. Mason, A. M. Sawvel, M. Zavarin, M. Nyman and G. J.-P. Deblonde, *Nat. Chem.*, 2022, **14**, 1357–1366.
- 2 R. D. Peacock and T. J. R. Weakley, *J. Chem. Soc. A*, 1971, 1836–1839.
- 3 G. M. Sheldrick, *Bruker-Siemens area Detection Absorption other Correction*, 2008.
- 4 G. M. Sheldrick, *Acta Cryst A*, 2015, **71**, 3–8.
- 5 G. M. Sheldrick, *Acta Cryst A*, 2008, **64**, 112–122.
- 6 O. V. Dolomanov, L. J. Bourhis, R. J. Gildea, J. a. K. Howard and H. Puschmann, *J Appl Cryst*, 2009, **42**, 339–341.
- 7 P. Van Der Sluis and A. L. Spek, *Acta Crystallographica Section A*, 1990, **46**, 194–201.
- 8 L. Glasser, *Acta Cryst B*, 2019, **75**, 784–787.
- 9 L. Glasser, *Crystal Growth & Design*, 2019, **19**, 3397–3401.
- 10 G. Xue, J. Vaissermann and P. Gouzerh, *Journal of Cluster Science*, 2002, **13**, 409–421.
- 11 J. J. Baldoví, J. M. Clemente-Juan, E. Coronado, Y. Duan, A. Gaita-Ariño and C. Giménez-Saiz, *Inorg. Chem.*, 2014, **53**, 9976–9980.
- 12 T. Ozeki and T. Yamase, *Acta Cryst C*, 1994, **50**, 327–330.
- 13 M. Sugeta and T. Yamase, *Bulletin of the Chemical Society of Japan*, 1993, **66**, 444–449.
- 14 O. Yu. Mariichak, V. V. Ignatyeva, V. N. Baumer, G. M. Rozantsev and S. V. Radio, *J Chem Crystallogr*, 2020, **50**, 255–266.
- 15 T. Yamase, T. Ozeki and M. Tosaka, *Acta Cryst C*, 1994, **50**, 1849–1852.
- 16 K. Sawada and T. Yamase, *Acta Cryst C*, 2002, **58**, i149–i151.
- 17 M. Shiddiq, D. Komijani, Y. Duan, A. Gaita-Ariño, E. Coronado and S. Hill, *Nature*, 2016, **531**, 348–351.
- 18 M. A. AlDamen, S. Cardona-Serra, J. M. Clemente-Juan, E. Coronado, A. Gaita-Ariño, C. Martí-Gastaldo, F. Luis and O. Montero, *Inorg. Chem.*, 2009, **48**, 3467–3479.
- 19 M. A. AlDamen, J. M. Clemente-Juan, E. Coronado, C. Martí-Gastaldo and A. Gaita-Ariño, *J. Am. Chem. Soc.*, 2008, **130**, 8874–8875.
- 20 O. Y. Mariichak, S. Kaabel, Y. A. Karpichev, G. M. Rozantsev, S. V. Radio, C. Pichon, H. Bolvin and J.-P. Sutter, *Magnetochemistry*, 2020, **6**, 53.
- 21 F. A. Almeida Paz, M. S. S. Balula, A. M. V. Cavaleiro, J. Klinowski and H. I. S. Nogueira, *Acta Cryst E*, 2005, **61**, i28–i31.
- 22 T. Ozeki and T. Yamase, *Acta Cryst C*, 1993, **49**, 1574–1577.
- 23 T. Ozeki and T. Yamase, *Acta Cryst B*, 1994, **50**, 128–134.
- 24 T. Ozeki, M. Takahashi and T. Yamase, *Acta Cryst C*, 1992, **48**, 1370–1374.
